# Supplementary material for: Targeting duplex DNA with chimeric α,β-triplex-forming oligonucleotides
Source: PubMed Central journal article supplement — Nucleic Acids Res. 2012 May 25;40(16):8175–85. doi: 10.1093/nar/gks410 (PMC3439883; doi:10.1093/nar/gks410), 2012-05-25
Supplement: supp_gks410_nar-00168-f-2012-File014.pdf [file supp_gks410_nar-00168-f-2012-File014.pdf]

Supplementary Table ST1. Microarray hybridisation data.

| <i>h1</i> |        |        |        | <i>h2</i> |        |        |        |
|-----------|--------|--------|--------|-----------|--------|--------|--------|
| 0.059     | 0.010  | 0.328  | 0.313  | 0.012     | 0.048  | 0.178  | 0.178  |
| -0.086    | -0.075 | 0.071  | -0.038 | -0.103    | -0.072 | -0.014 | -0.026 |
| 0.015     | 0.072  | 0.066  | 0.111  | -0.025    | 0.012  | 0.032  | 0.108  |
| <i>h3</i> |        |        |        | <i>h4</i> |        |        |        |
| 0.096     | 0.071  | 0.767  | 0.652  | 0.075     | 0.060  | 0.311  | 0.345  |
| -0.071    | -0.059 | 0.103  | 0.133  | -0.066    | -0.072 | 0.054  | 0.181  |
| 0.082     | 0.223  | -0.053 | -0.073 | 0.052     | 0.158  | -0.051 | -0.066 |
| <i>h5</i> |        |        |        | <i>h6</i> |        |        |        |
| 0.035     | -0.013 | 0.090  | 0.076  | -0.014    | -0.002 | 0.093  | 0.090  |
| -0.028    | -0.041 | 0.030  | 0.090  | -0.042    | -0.052 | -0.007 | -0.030 |
| 0.454     | -0.010 | 0.051  | -0.006 | 0.032     | 1.562  | -0.009 | -0.022 |

Supplementary Table ST2. Triplex formation by probes *a1-a4* and *b1-b4* with hairpins *h1-h4*.  
Quantitation of triplex bands (%) in non-denaturing PAGE.

|           | <i>a1</i> | <i>a2</i> | <i>a3</i> | <i>a4</i> | <i>b1</i> | <i>b2</i> | <i>b3</i> | <i>b4</i> |
|-----------|-----------|-----------|-----------|-----------|-----------|-----------|-----------|-----------|
| <i>h1</i> | 70        | 63        | 68        | 23        | 0         | 5         | 49        | 6         |
| <i>h2</i> | 58        | 92        | 62        | br*       | 0         | 0         | 83        | 0         |
| <i>h3</i> | 9         | 13        | 62        | 85        | 8         | 7         | 6         | 7         |
| <i>h4</i> | 4         | 8         | 98        | 96        | 12        | 11        | 20        | 15        |

\* broad unresolved band

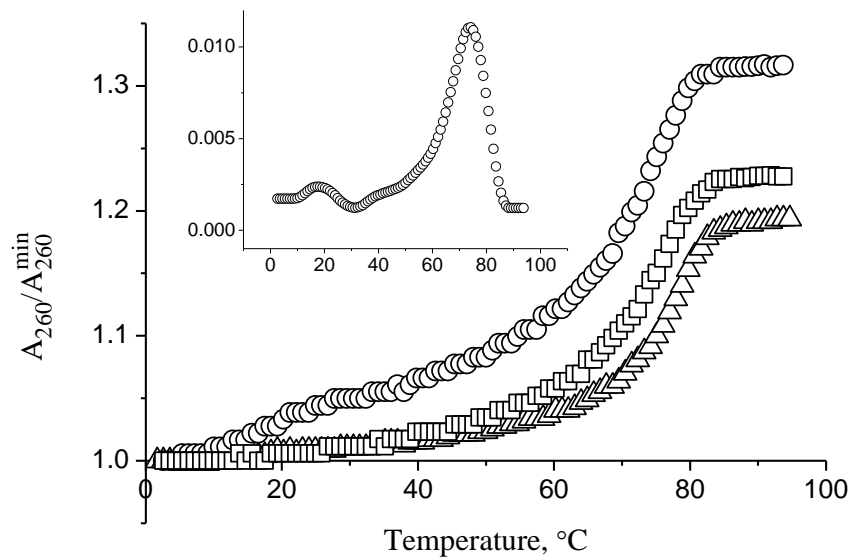

Supplementary Figure SF1. UV melting profiles of chimeric triplexes *a1-h1* (circles), *c4-h1* (squares) and *a3-h3* (triangles) in 0.1 M TBE and 30 mM MgCl<sub>2</sub> and a plot of the first derivative for triplex *a1-h1*.

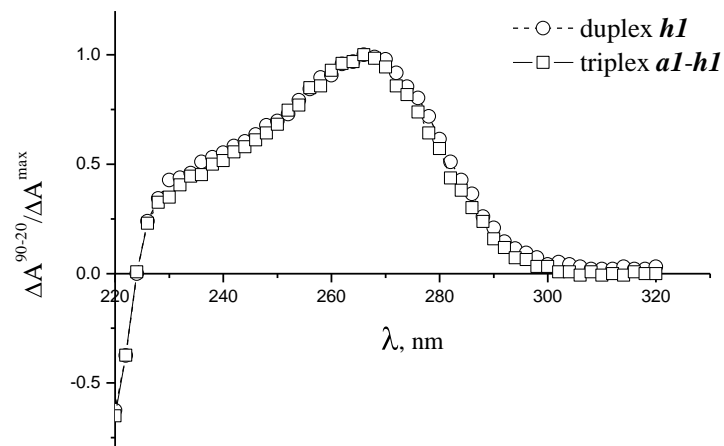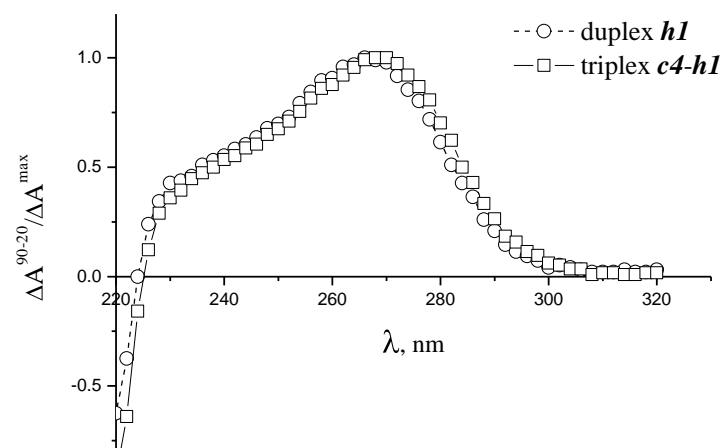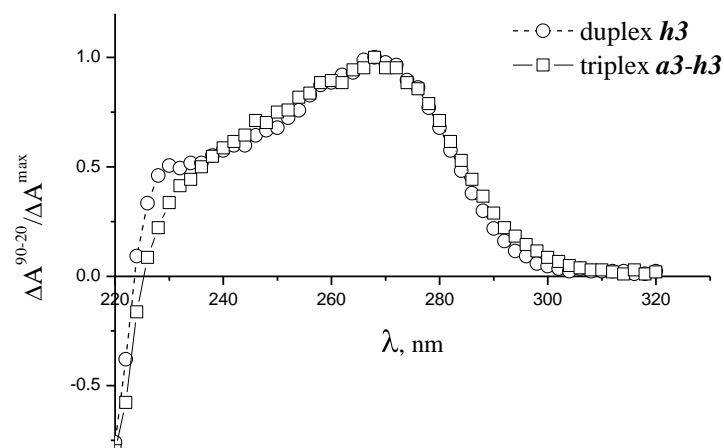

Supplementary Figure SF2. Normalized thermal difference spectra (90 vs. 20°C) for triplexes *a1-h1*, *c4-h1* and *a3-h3* and underlying duplexes *h1* and *h3*.

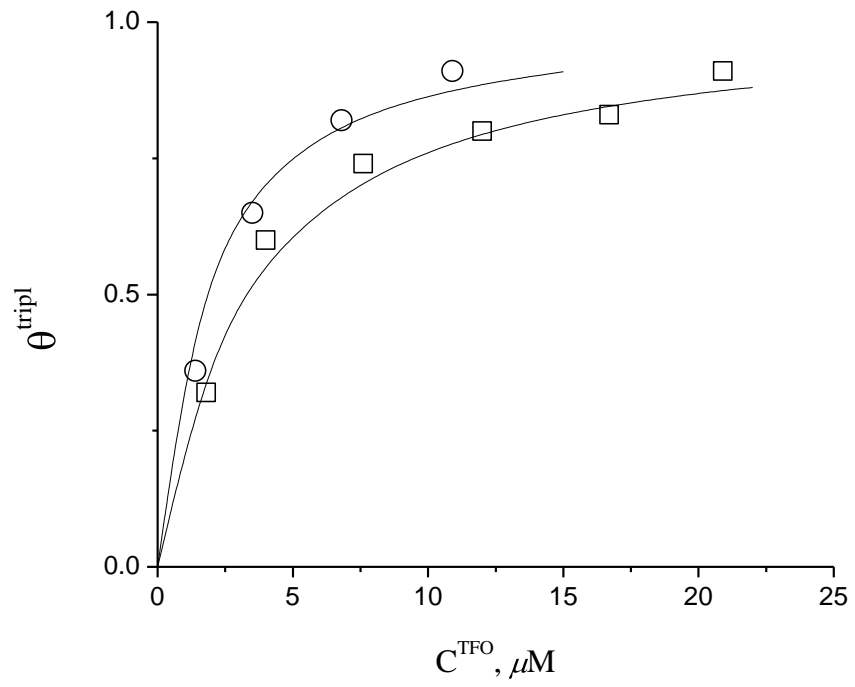

Supplementary Figure SF3. Binding curves for triplex **A** (circles) and for mixed triplex **A**<sup>dupl</sup>**B**<sup>TFO</sup> (squares).

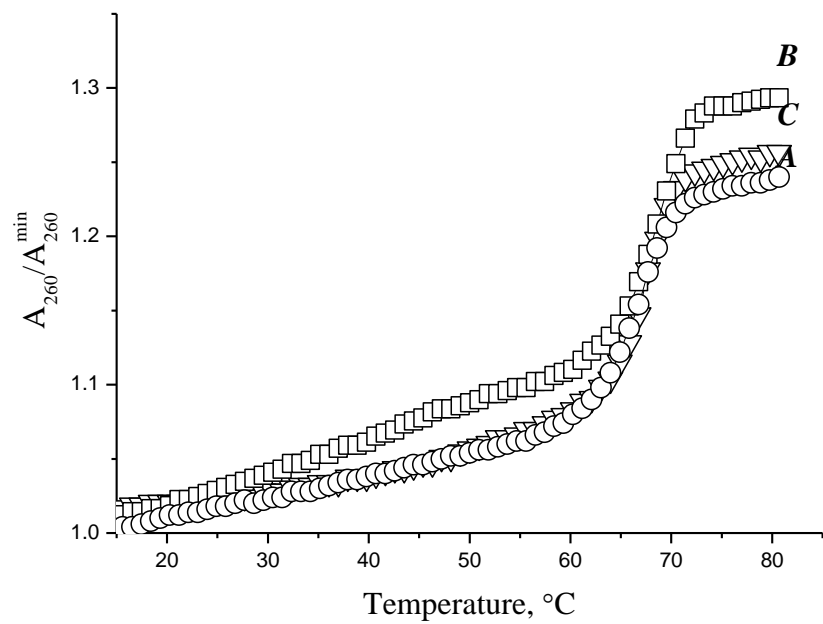

Supplementary Figure SF4. UV melting profiles of chimeric triplexes **A**, **B** and **C** in 0.1 M TBE and 30 mM MgCl<sub>2</sub>.
